# Supplementary material
Source: HighWire-hosted journal article supplement (https://genome.cshlp.org/content/suppl/2005/06/22/15.7.987)

Figure S1A

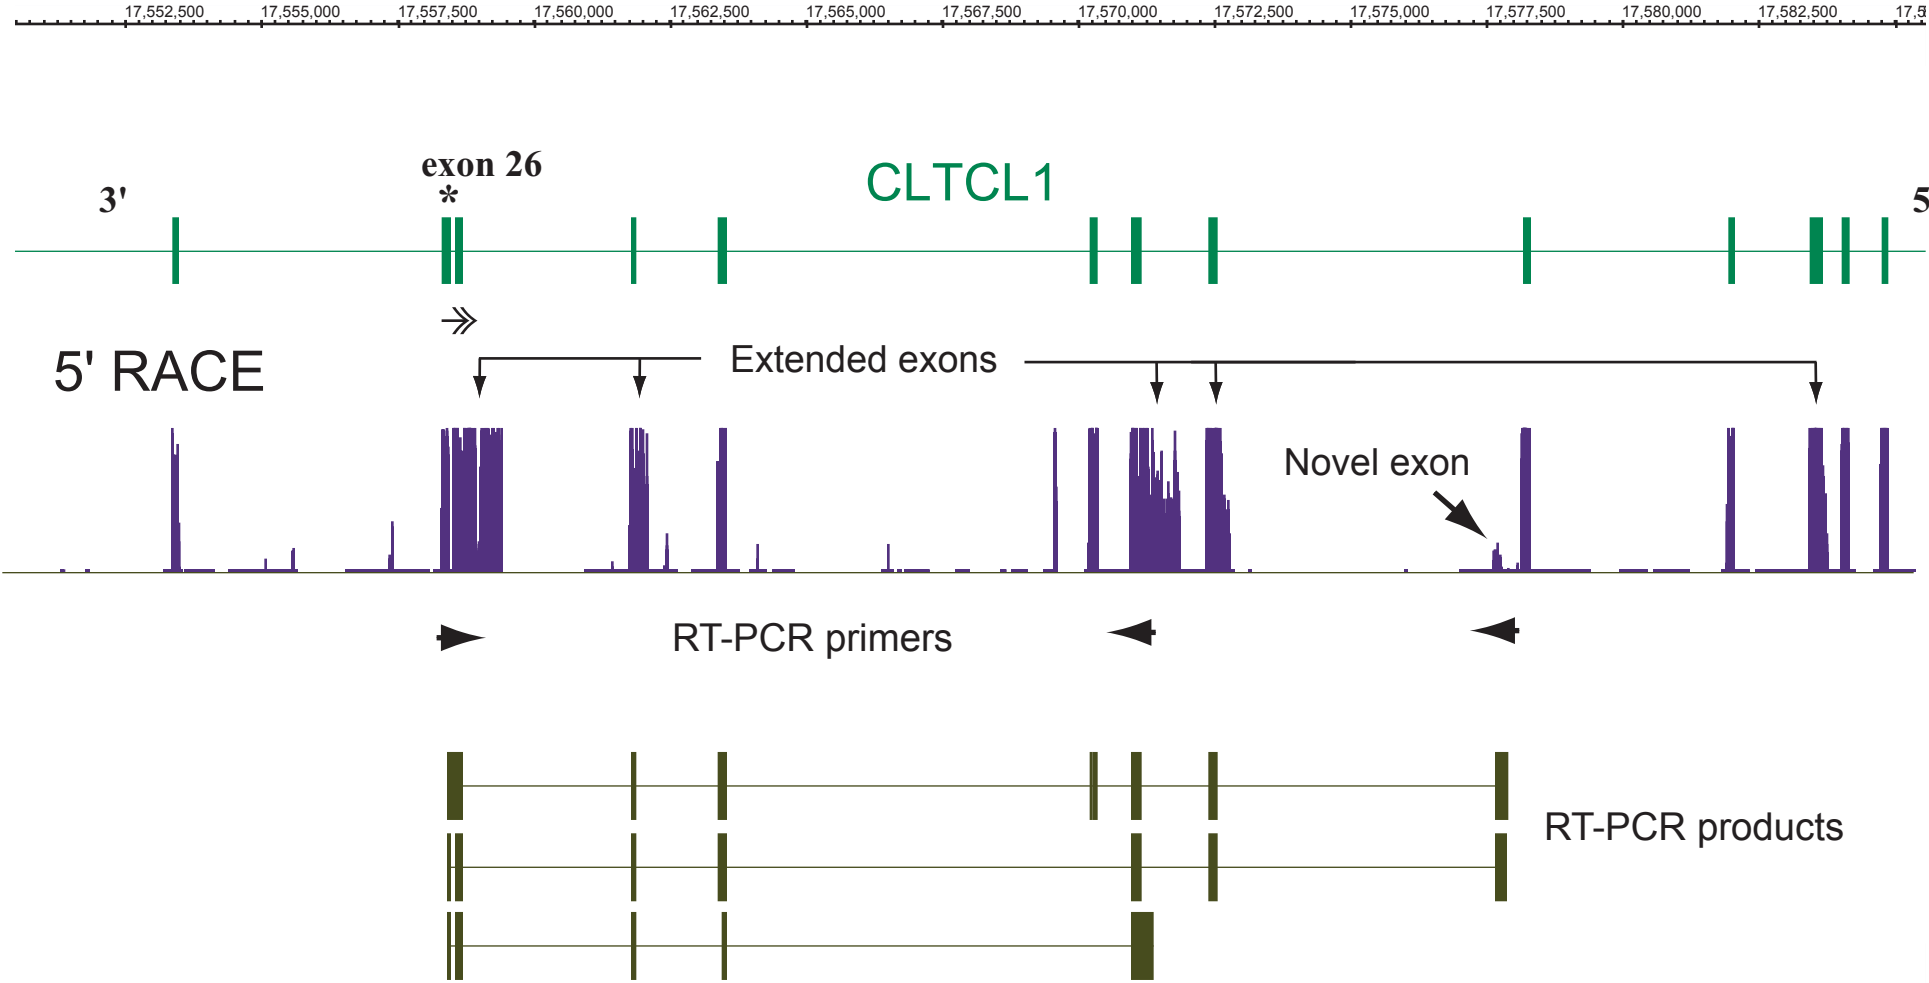

Supplement: FigureS1A.pdf [file FigureS1A.pdf]

Figure S1B

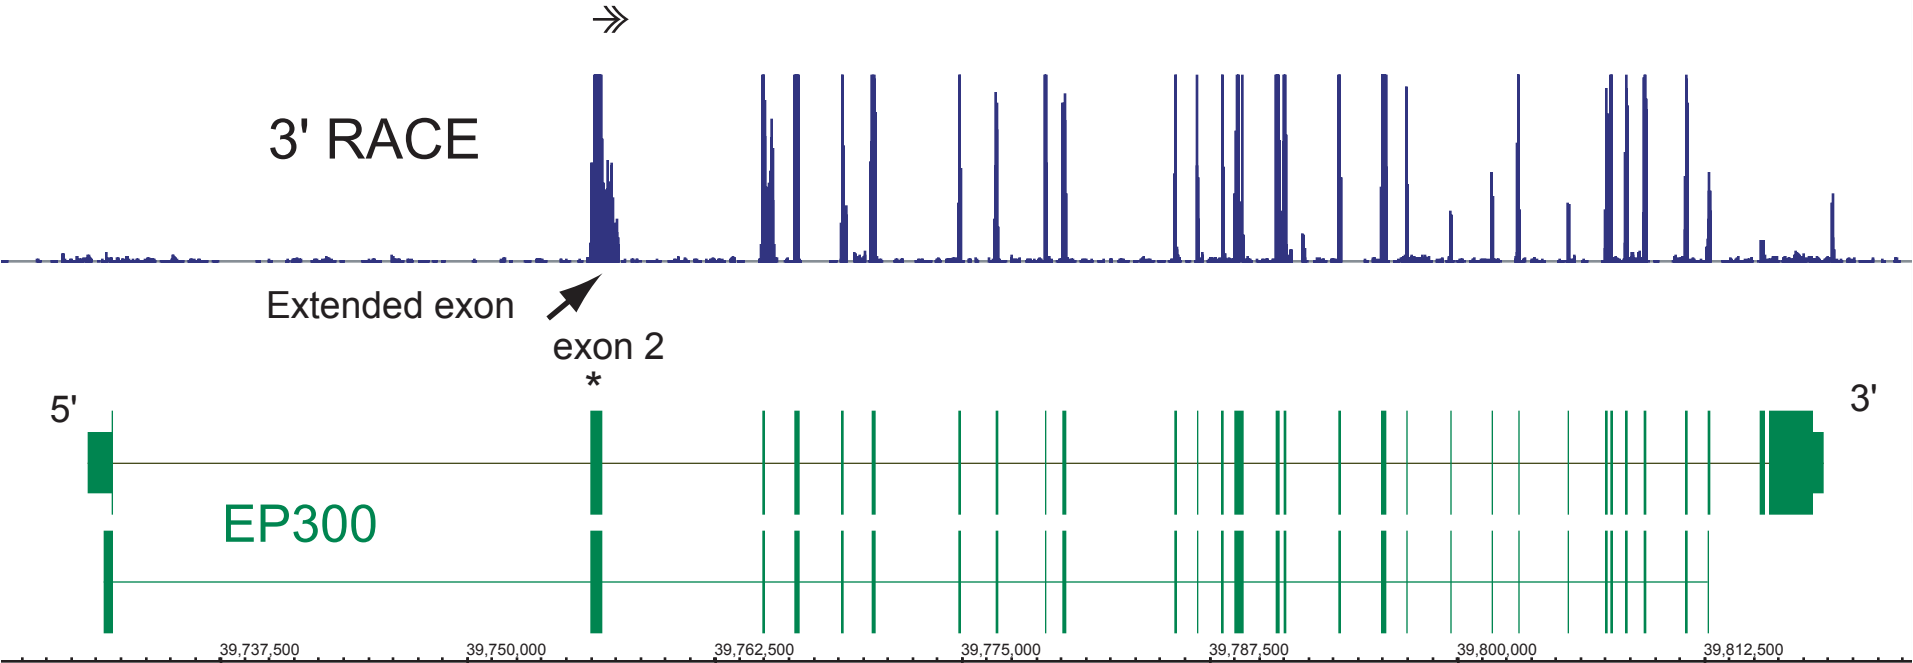

Supplement: FigureS1B.pdf [file FigureS1B.pdf]

Figure S1C

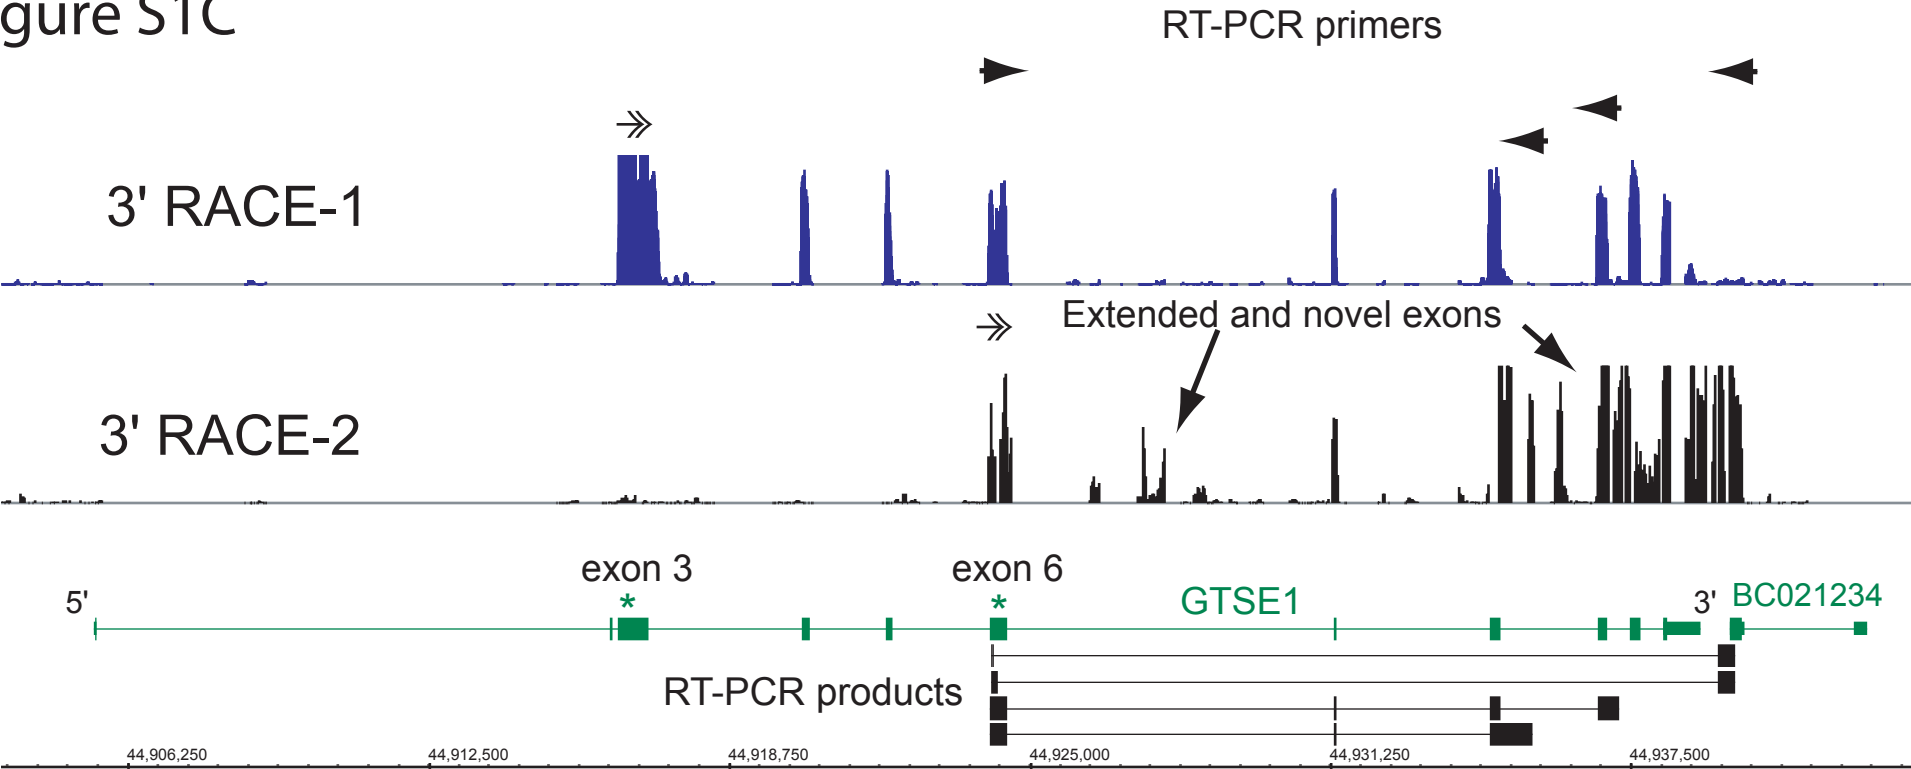

Supplement: FigureS1C.pdf [file FigureS1C.pdf]

Figure S1D

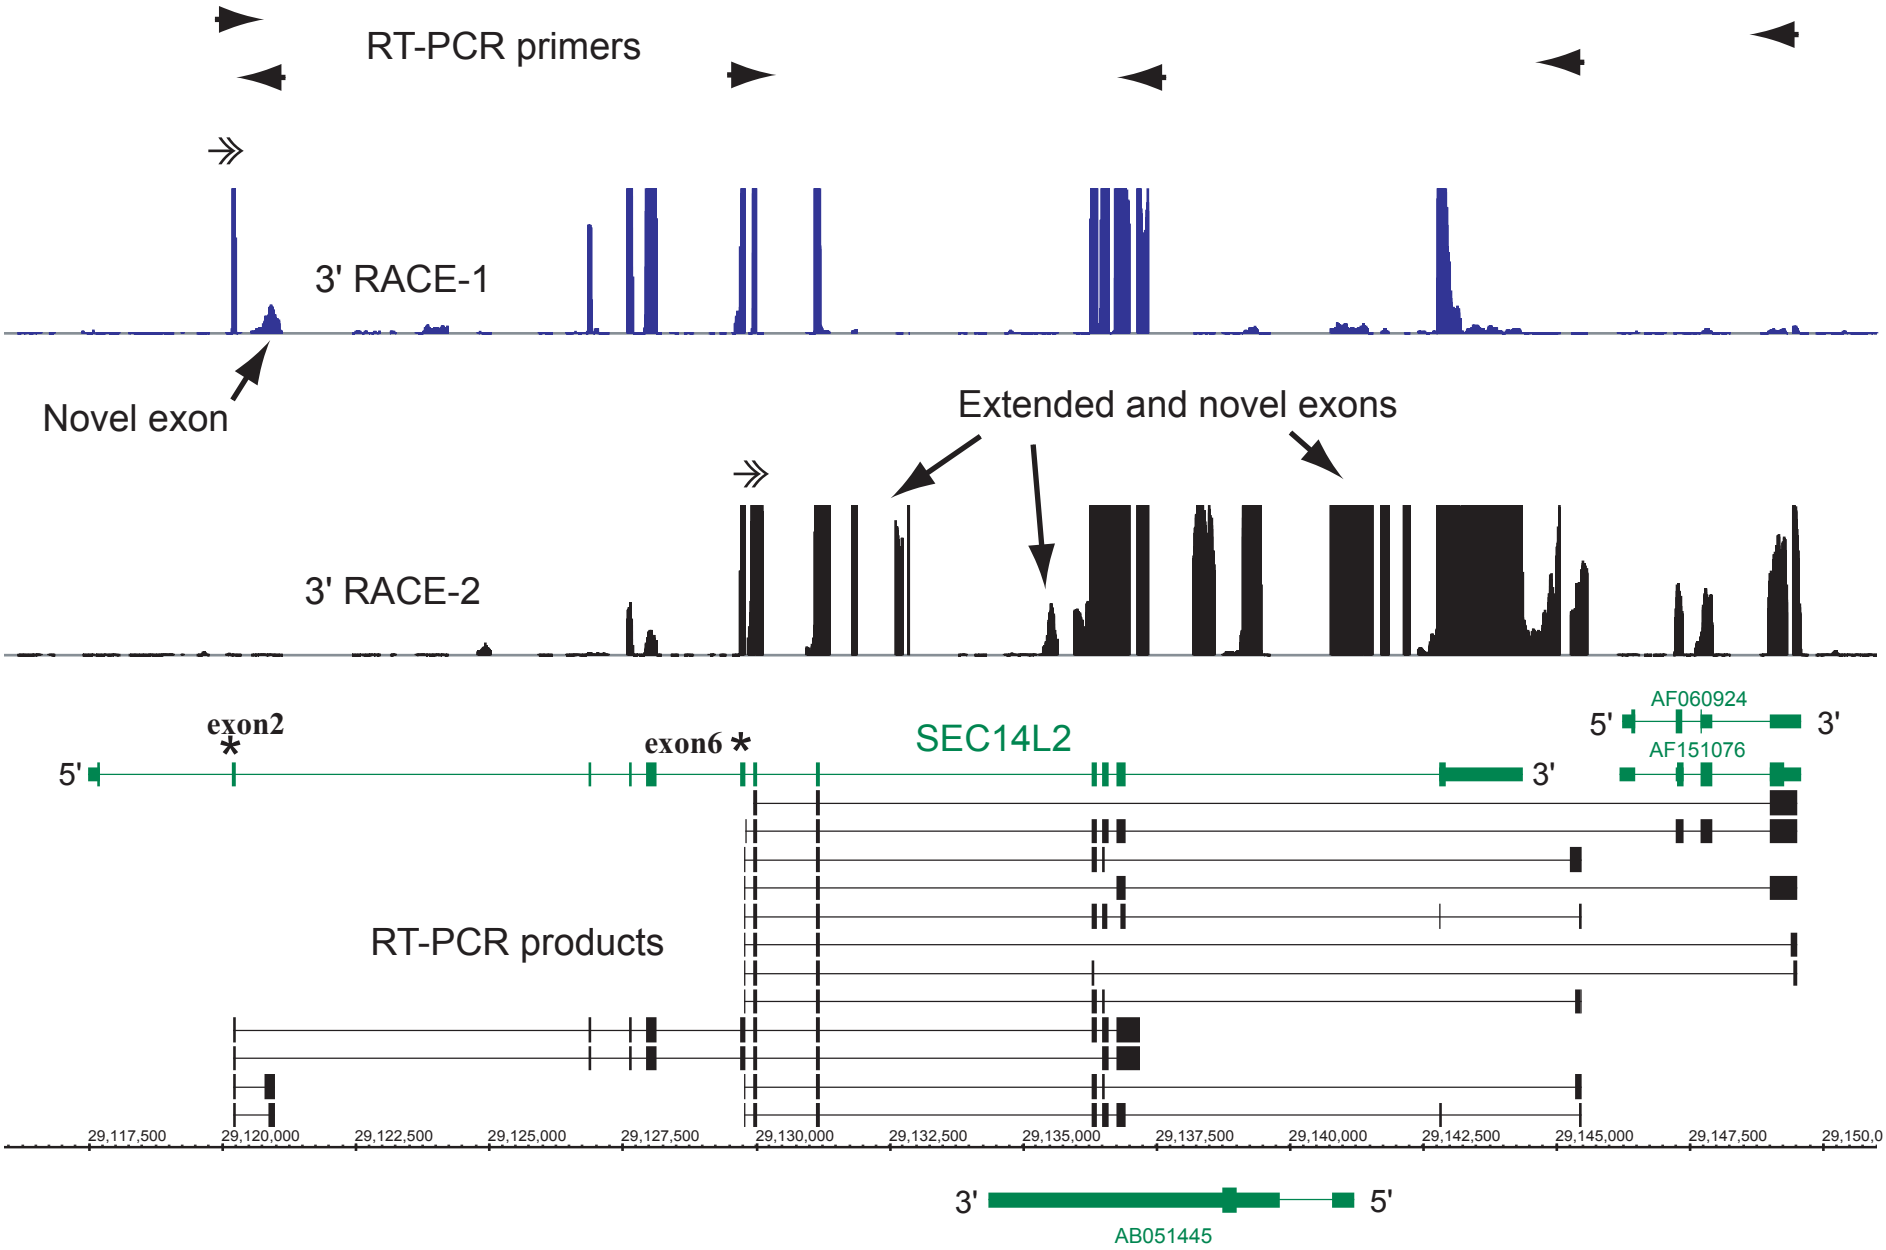

Supplement: FigureS1D.pdf [file FigureS1D.pdf]

Figure S3

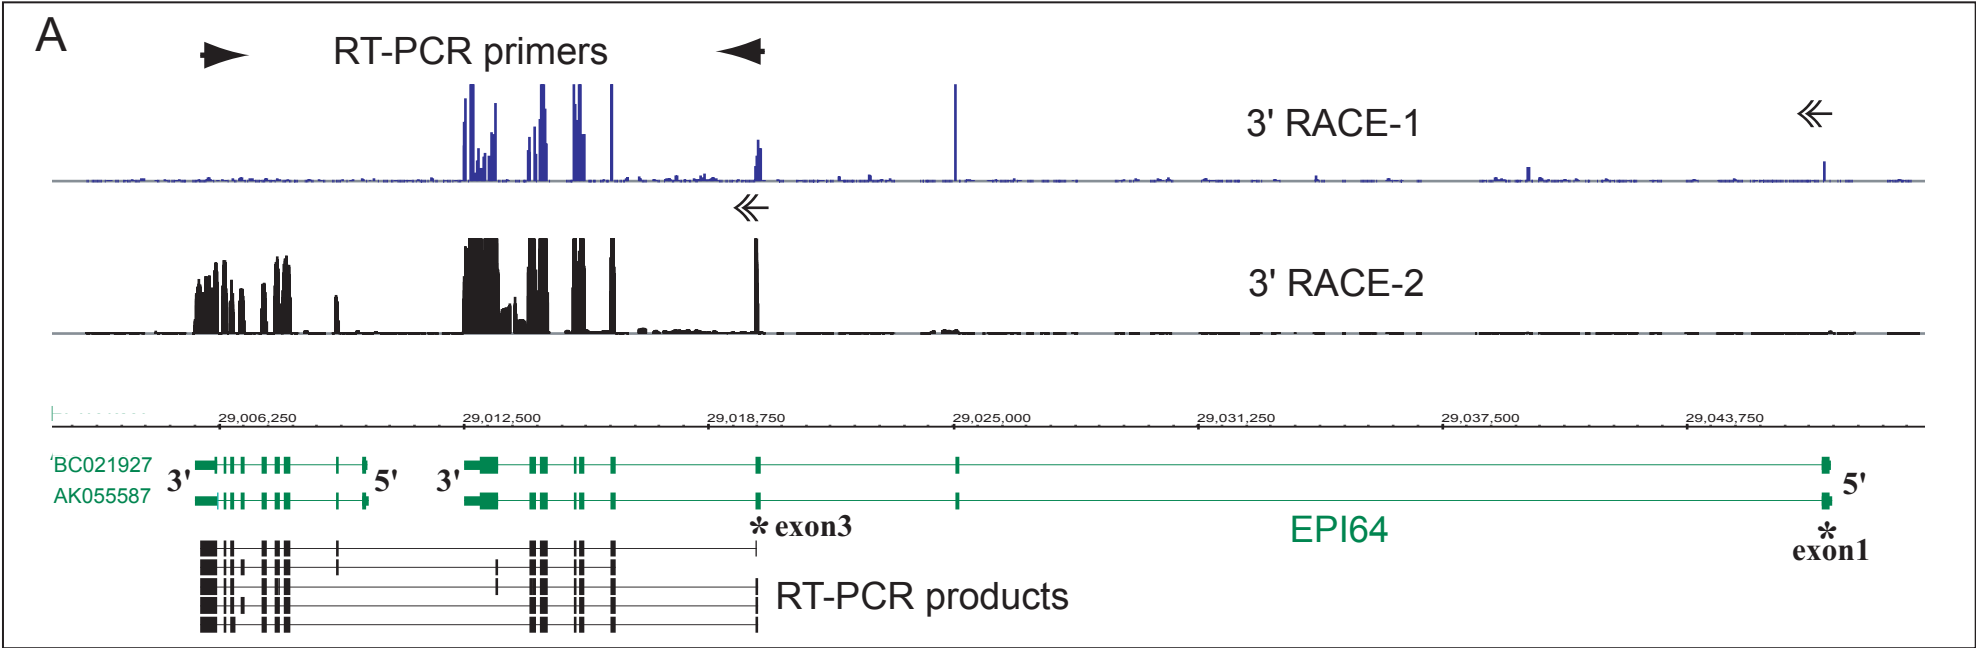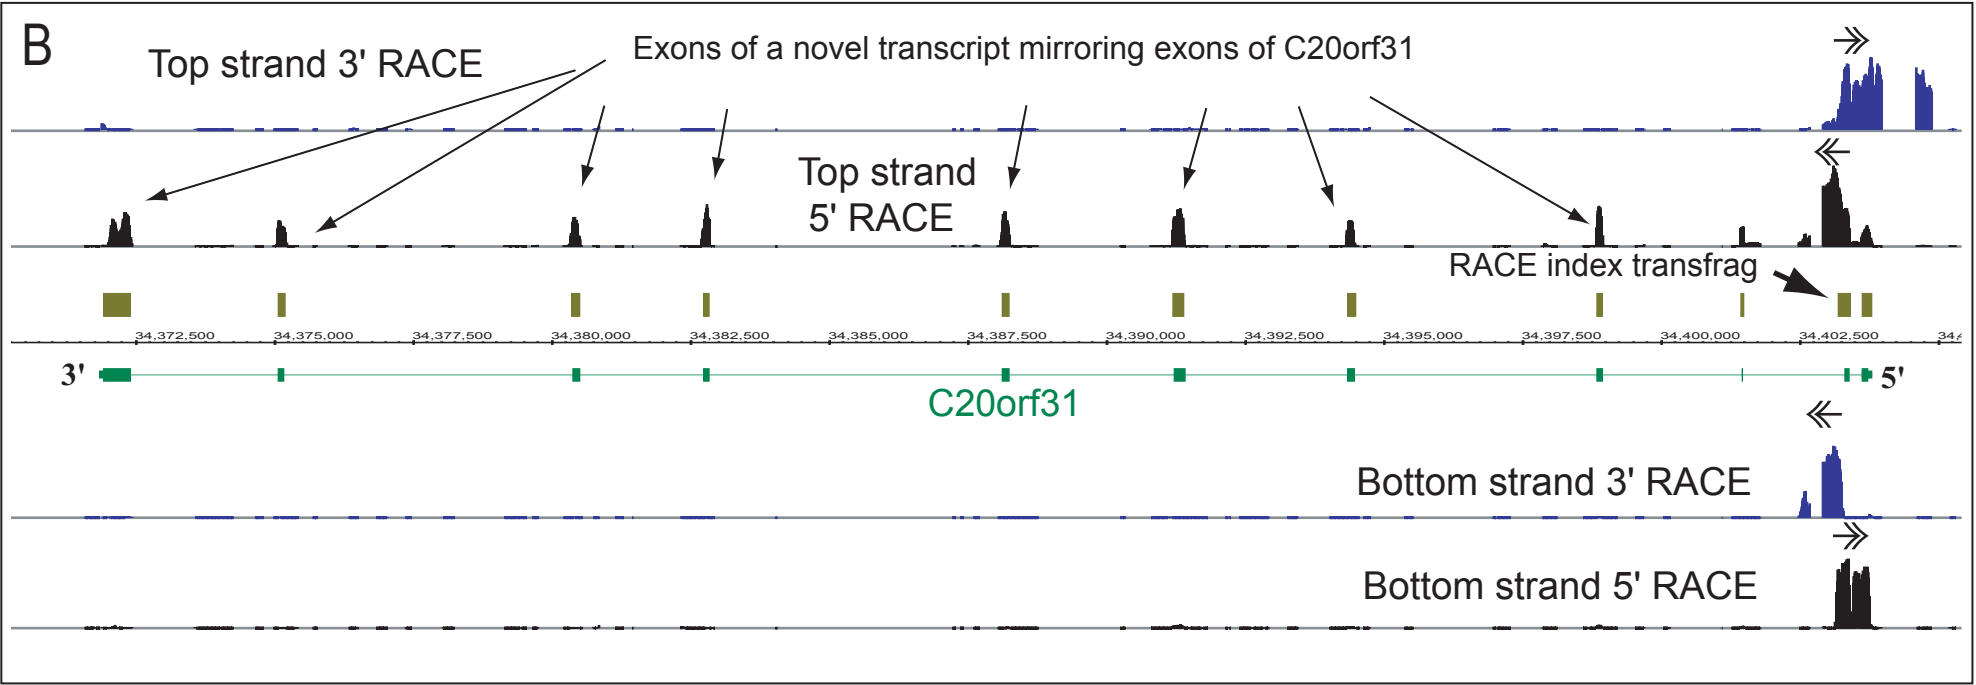

Supplement: FigureS3.pdf [file FigureS3.pdf]
